# Supplementary material for: A reporter for noninvasively monitoring gene expression and plant transformation
Source: PubMed Central journal article supplement (PMC7502077; doi:10.1038/s41438-020-00390-1), 2020-09-19
Supplement: 41438_2020_390_MOESM1_ESM.pdf [file 41438_2020_390_MOESM1_ESM.pdf]

ATGGATCATGCGACCCTCGCCATGATCCTCGCGATCTGGTTCATCAGCTTCCACTTCATCAAGC  
TGCTGTTCTCCCAGCAGACCACCAAGCTGCTTCCGCCAGGACCAAAGCCGCTTCCGATCATCGG  
CAACATCCTTGAGGTGGGCAAGAAGCCGCATCGGTCTTCGCCAACCTCGCCAAGATTCACGGC  
CCACTCATTTCCCTCAGACTCGGCTCTGTGACCACCATCGTTGTGTCTCTGCCGACGTGGCCA  
AAGAGATGTTCCCTCAAGAAGGATCACCCGCTCTCCAACCGCACGATCCCGAATAGTGTTACAGC  
CGGCGACCACCACAAGCTCACCATGTCTTGCTCCCGGTGTCTCCGAAGTGGCGCAACTTCCGC  
AAGATTACCGCCGTGCATCTGCTCTCCCCACAGAGACTCGATGCCTGCCAGACATTCAGGCAG  
CCAAGGTGCAGCAGCTCTACGAGTACGTTCAAGAGTGCGCCCAGAAAGGCCAGGCCGTGGATAT  
TGGCAAGGCCGCCTTTACGACCAGCCTCAACCTCCTCAGCAAGCTGTTCTTCAGCGTCGAGCTG  
GCGCACCACAAGTCCCATAACCAGCCAAGAGTTCAAAGAGCTGATCTGGAACATCATGGAAGATA  
TAGGCAAGCCGAACACTACGCCGACTACTTCCCGATTCTCGGCTGCGTTGACCCATCTGGCATTAG  
AAGAAGGCTCGCCTGCTCCTTCGACAAGCTGATCGCCGTGTTCCAGGGCATCATCTGCGAGAGA  
CTCGCCCCAGATTCCTCCACCACAACACTACCACCACCACCGACGACGTGCTCGATGTGCTCCTCC  
AGCTGTTCAAGCAGAACGAGCTGACGATGGGCGAGATCAACCACCTCCTCGTGGACATCTTCGA  
CGCCGGCACCCGATACCACATCCTCCACATTCGAGTGGGTGATGACCGAGCTGATCCGCAATCCA  
GAGATGATGGAAAAGGCCAAGAGGAAATCAAGCAGGTCTCGGCAAGGACAAGCAGATCCAAG  
AGTCCGACATCATCAACCTGCCGTACCTCCAGGCGATCATCAAAGAGACACTCCGCTCCATCC  
GCCGACCGTGTCTTGTCTCCAAGAAAGGCCGACACCGATGTGCGAGCTGTACGGCTACATCGTG  
CCGAAGGATGCCAGATCCTCGTGAACCTCTGGGCCATTGGCAGGGACCCAAACGCCTGGCAGA  
ACGCCGATATTTTCAGCCCAGAGCGCTTCATCGGCTGCGAGATCGATGTTAAGGGCCGCGATTT  
CGGCTCCTTCCATTTGGCGCTGGCCGAGAAATTTGCCAGGCATGAATCTCGCCATCAGGATG  
CTCACCTCATGCTCGCCACACTCCTCCAGTTCTTCAACTGGAAGCTCGAAGGCGACATCTCCC  
CGAAGGACCTCGACATGGACGAGAAGTTCGGCATTGCGCTCCAAAAGACCAAGCCGCTCAAGCT  
CATCCCGATTCCGCGCTAC**GGAAGCGGAGCTACTAACTTCAGCCTGCTGAAGCAGGCTGGAGAC**  
**GTGGAGGAGAACCCTGGACCT**ATGAAGATGATGAACGGCGAGGACGCCAACGACCAGATGATCA  
AAGAGTCCTTCTTCATCACCCACGGCAACCCGATCCTCACCGTCGAGGATACACATCCGCTCAG  
GCCGTTCTTCGAGACATGGCGCGAGAAGATTTTCTCCAAGAAGCCGAAGGCCATCCTCATCATC  
TCCGGCCACTGGGAGACAGTGAAGCCAACCGTGAACGCCGTGCACATCAACGACACCATCCACG  
ACTTCGACGACTACCCAGCCGCCATGTACCAGTTCAAGTACCCAGCTCCAGGCGAGCCAGAGCT  
TGCGAGAAAGGTGGAAGAGATCCTCAAGAAGTCCGGGTTCGAGACAGCCGAGACAGACCAAAAG  
AGGGCCCTTGATCACGGCGCCTGGGTTCCACTCATGCTCATGTATCCAGAGGGCGGACATCCCGG  
TGTGCCAGCTCTCAGTTCAGCCACATCTCGACGGCACCTACCCTACAATCTCGGCAGAGCCCT  
CGCGCCGCTCAAGAATGATGGCGTGCTCATTATTTGGCTCCGGCAGCGCCACACATCCACTCGAT  
GAGACACCGCACTACTTCGATGGTGTGGCCCTTGGGCCGCTGCCTTCGATTCTTGGCTTAGGA  
AGGCCCTCATCAACGGCCGCTTCGAGGAAGTGAACATCTACGAGAGCAAGGCCCCGAACCTGGAA  
GCTCGCCCATCCATTTCCAGAGCACTTCTACCCGCTCCACGTTGTGCTCGGCGCTGCTGGTGAA  
AAGTGGAAAGGCCGAGCTGATCCACTCCTCCTGGGATCATGGCACACTTTGCCACGGCTCCTACA  
AGTTCACCTCCGCC**GGTTCAGGTGCCACTAATTTTTCTCTTGAACAGGCCGGTGACGTTGA**

**AGAGAACCCAGGTCCA**ATGACCGCCATCAAGATGAACACCAACGGCGAGGGCGAGACACAGCAC  
 ATCCTCATGATCCCGTTCATGGCGCAGGGCCACCTCAGGCCATTTCTCGAACTCGCCATGTTCC  
 TCTACAAGCGCTCCCACGTGATCATCACCTGCTCACAACCTCCGCTCAACGCCGGCTTCCTCAG  
 GCACCTCCTTACCACCATTCTACTCCTCCAGCGGCATCAGGATCGTCGAGCTGCCATTCAAC  
 TCCACCAACCACGACTCCCACCGGGCATCGAGAACACCGATAAGCTCACACTCCCGCTCGTGG  
 TGTCCCTCTTCCATTCCACCATCAGCTCGATCCGCACCTCCGCGATTACATCTCCAGGCATTT  
 CAGCCCAGCCAGGCCACCACTCTGCGTGATCCATGATGTGTTCTCGGCTGGGTTGACCAGGTG  
 GCCAAGGATGTGGGCTCTACAGGCGTGGTGTTCACAACAGGCGGCGCTTATGGCACATCCGCCT  
 ACGTGTCCATCTGGAACGATCTCCCGCACCAGAATACTCCGACGACCAAGAGTTCCCGCTGCC  
 AGGCTTCCCAGAGAACCATAAGTTCCGCAGGTCCCAGCTCCATCGGTTCTCAGATATGCCGAC  
 GGCTCCGACGATTGGTCCAAGTATTTCCAGCCGCAGCTCCGCCAGTCCATGAAGTCTTTTGGCT  
 GGCTCTGCAACTCCGTGGAAGAGATCGAGACACTCGGCTTCTCCATCCTCCGCAACTACACCAA  
 GCTGCCGATCTGGGGCATCGGCCCACTTATTGCTTCCCAGTGCAGCACTCCTCCTCCGACAAC  
 AATTCAACAGGCGCCGAGTTCGTGCAGTGGCTCAGCCTCAAAGAGCCGGACTCCGTCTCTACA  
 TCTCCTTCGGCTCCCAGAACACGATCAGCCCGACGCAGATGATGGAACCTCGCTGCTGGCCTTGA  
 GTCCTCCGAGAAGCCATTCCTCTGGGTGATCAGAGCCCCGTTCCGGCTTCGACATCAACGAAGAG  
 ATGCGCCCAGAGTGGCTGCCAGAGGGCTTTGAGGAACGCATGAAGGTGAAGAAACAGGGCAAGC  
 TCGTGTACAAGCTCGGCCCGCAGCTTGAGATCCTCAACCATGAATCCATCGGCGGCTTTCTCAC  
 CCACTGCGGATGGAACAGCATCCTTGAGTCTCTTCGCGAGGGCGTTCCGATGCTTGGATGGCCA  
 CTTGCTGCCGAGCAGGCCTACAACCTCAAGTACCTCGAAGATGAGATGGGCGTCGCGGTTGAGC  
 TTGCTAGAGGCCCTCGAAGGCGAGATCTCCAAAGAGAAGGTCAAGCGCATCGTCGAGATGATCCT  
 TGAGCGCAACGAGGGCTCCAAAGGCTGGGAGATGAAGAATCGCGCCGTGGAAATGGGCAAAAAG  
 CTCAAGGACGCCGTGAACGAGGAAAAGAGCTGAAGGGCTCCTCCGTGAAGGCGATCGACGATT  
 TCCTCGACGCCGTCATGCAGGCCAACTTGAGCCAAGCCTCCAGTGATAGTGA  
**ATATGAAGATGAAGATGAAATATTTGGTGTGTCAAATAAAAAGTTGTGTGCTTAAGTTTGTGT  
 TTTTTTCTTGGCTTGTGTGTTATGAATTTGTGGCTTTTTCTAATATTAAATGAATGTAACATC  
 TCATTATAATGAATAAACAATGTTTCTATAATCCATTGTGAATGTTTTGTTGGATCTCTTCTC  
 CAGCATATAACTACTGTATGTGCTATGGTATGGACTATGGAATATGATTAAAGATAAG**

**Supplemental Fig. 1. The complete sequence of *RUBY* reporter. The betalain biosynthetic genes *CYP76AD1* (highlighted in light blue), *DODA* (yellow), and *Glucosyltransferase* (gray), were arranged as a single open reading frame. The three genes were linked by sequences (red) that encode 2A peptides. Note that the two 2A sequences differed in DNA sequences, but both encoded the same peptide, which had a sequence of GSGATNFSLLKQAGDVEENPGP. The *RUBY* ORF was followed by the Arabidopsis *HSP18.2* terminator. For rice plasmids, we used F2A peptide (QLLNFDLLKLAGDVESNPGP). The corresponding DNA sequence is: CAATTGTTGAATTTTGAATTTGTTGAAGTTGGCTGGAGATGTTGAATCTAATCCTGGACCT**

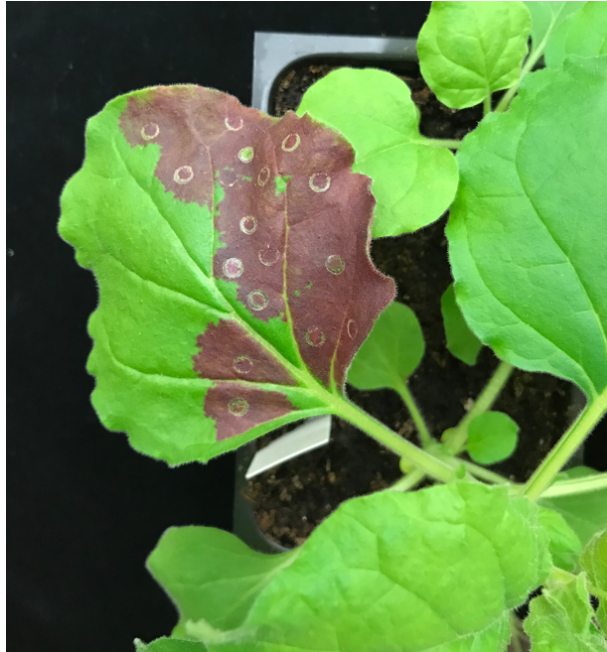

**Supplemental Fig. 2. Transient expression of *RUBY* in tobacco leaves.**  
Agrobacteria that contain the expression cassette of *RUBY* under the control of *CaMV 35S* promoter were infiltrated into tobacco leaves. The picture was taken 72 hours after infiltration.

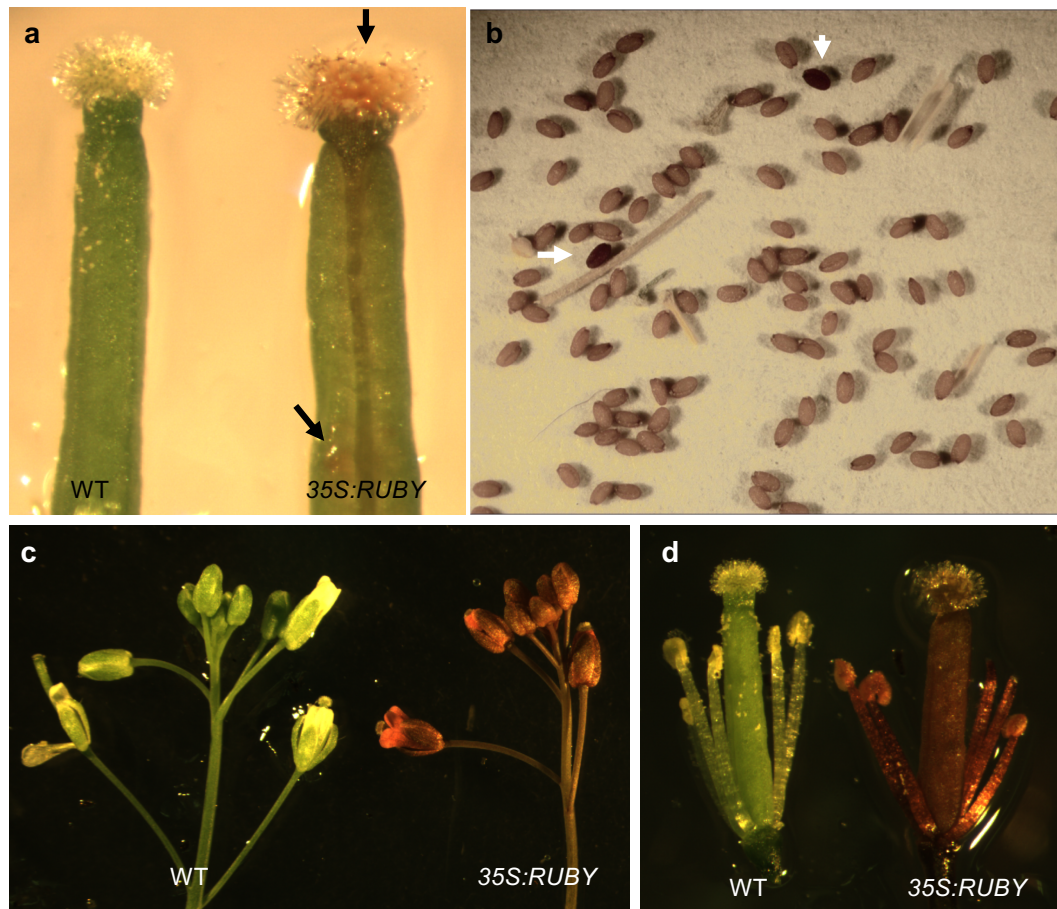

**Supplemental Fig. 3. Expression of *RUBY* driven by the *CaMV 35S* promoter in *Arabidopsis*.** **a)** Two days after floral dipping, red betalain was visible in some flowers (arrow) (right), suggesting that the betalain enzymes were produced transiently. **b)** Transgenic seeds (arrow) were easily distinguishable from non-transgenic seeds among the seeds harvested from plants underwent floral dipping. **c)** T1 plants of *35S:RUBY* (right) had red flowers and red stem. **d)** Betalain was synthesized in all floral organs in *35S:RUBY* plants.

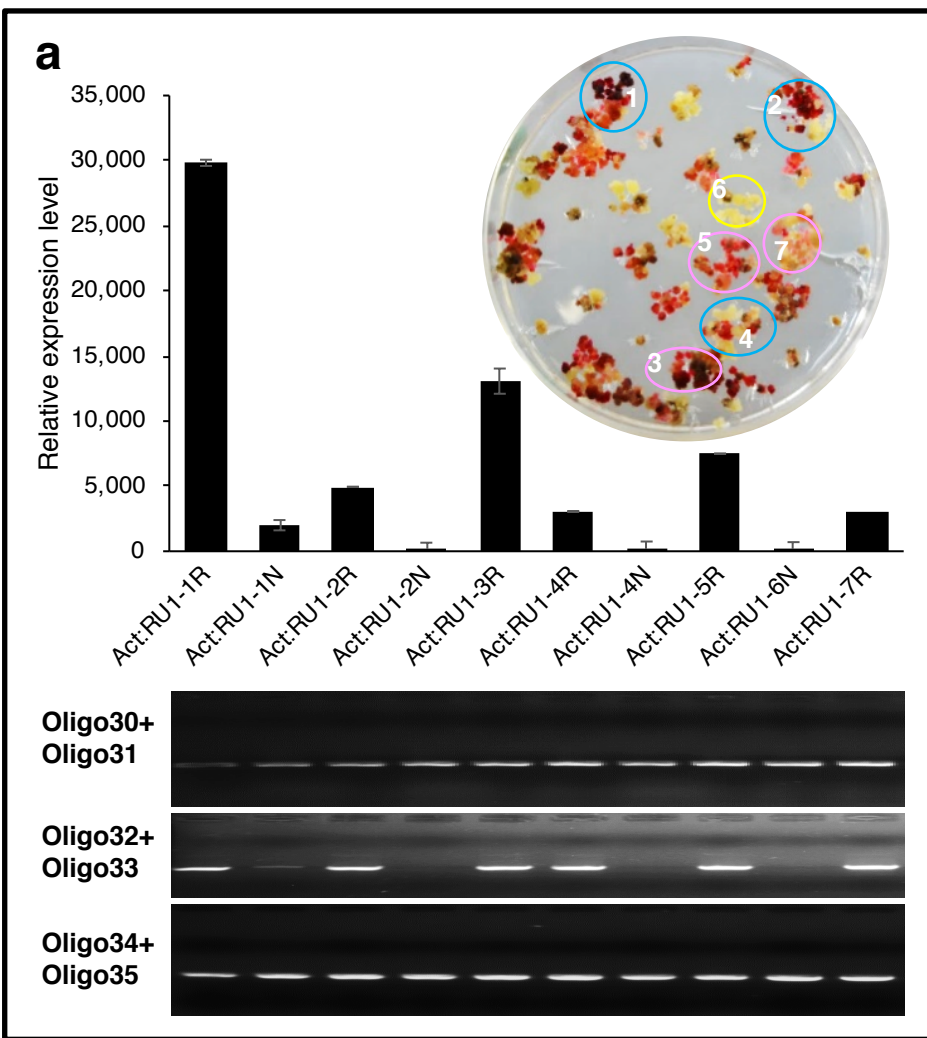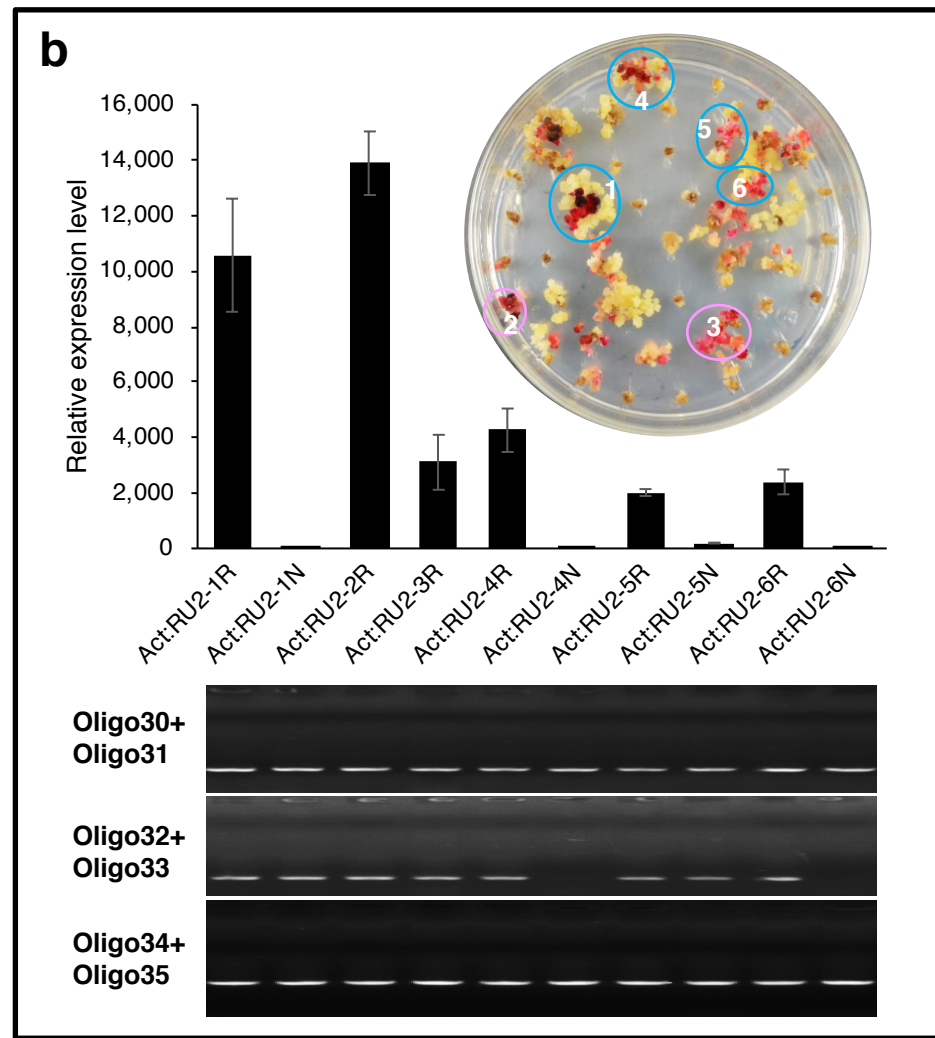

**Supplemental Fig. 4. Correlation of *RUBY* expression and the brightness of betalain color.** Independent hygromycin-resistant calli tissue blocks were used for quantitative analysis of the expression level of *RUBY* from two independent *OsACTIN1: RUBY* transformation experiments (**a**) and (**b**). *Act: RU1* and *Act: RU2* refer to plate 1 and plate 2 of two independent *OsACTIN1: RUBY* transformation events. The calli samples used for amplifying the DNA fragments of *RUBY* and *HptII*, and analyzing the *RUBY* expression level were numbered and labeled by circles with different colors. The circles in pink and yellow represent only red (R) and yellow (N) calli, respectively. The blue circle refers to both the red (R) and yellow (N) calli in same tissue block were analyzed separately. “R” in *Act:RU1-1R* and other terms refer to red tissue while “N” in the terms refer to negative of *RUBY* phenotypes. Oligo30/Oligo31, Oligo32/Oligo33 and Oligo34/Oligo35 refer the primer pairs used for detecting the presence the rice genome DNA, *RUBY* DNA and selection marker gene *HptII*, respectively. The primers were described in Supplemental Table 1.

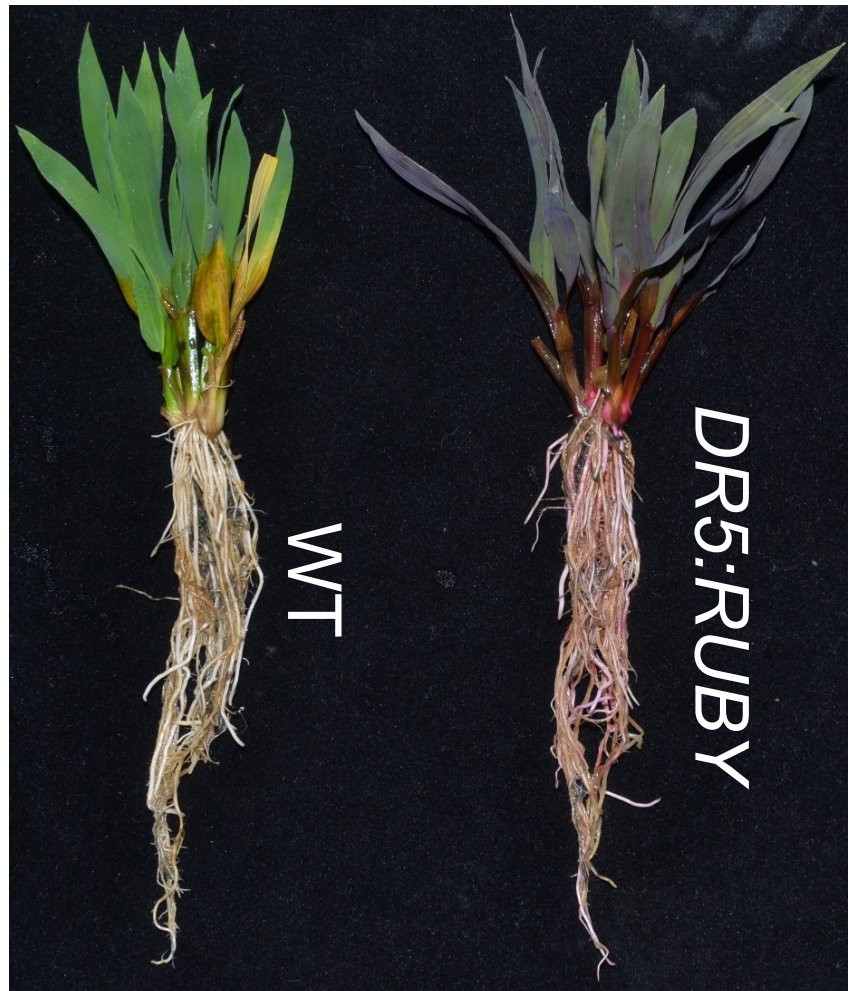

**Supplemental Fig. 5. RUBY is useful for monitoring transgenes in intact rice plants.** The expression of *DR5:RUBY* in Xiaowei<sup>NIP</sup> background was obvious in one month old plant grown in the field. WT refers to Xiaowei<sup>NIP</sup> plant.

| Primer name | Sequence                                                     | Annotation                                   |
|-------------|--------------------------------------------------------------|----------------------------------------------|
| Oligo1      | CACTGATAGTTTAAACTAGTATGGATCATGCGACCCTCGC                     | <i>RUBY</i> construction                     |
| Oligo2      | CACCTGCCTGCTTAAGGAGGCTAAAATTGGTAGCTCCGCTACCGTAGCGCGGAATCGGGA | <i>RUBY</i> construction                     |
| Oligo3      | CCTTAAGCAGGCAGGTGATGTAGAAGAGAAACCCCGGCCATGAAGATGATGAACGGCGA  | <i>RUBY</i> construction                     |
| Oligo4      | CTCCTGCTTGCTTGAGCAGGCTAAAGTTGGTTGCTCCGGATCCGGCGGAGGTGAACCTGT | <i>RUBY</i> construction                     |
| Oligo5      | GCTCAAGCAAGCAGGAGATGTTGAGGAAAATCCTGGCCCCATGACGCCATCAAGATGAA  | <i>RUBY</i> construction                     |
| Oligo6      | GCTAGCTTACTCAGTTAGGTCTTATCTTTAATCATATTCC                     | <i>RUBY</i> construction                     |
| Oligo7      | CTGTCAAACACTGATAGTTTTGAGACTTTTCAACAAAGGG                     | 35S: <i>RUBY</i> construction                |
| Oligo8      | CGCATGATCCATACTAGTTTTTCAGCGTGTCTCTCCAAAT                     | 35S: <i>RUBY</i> construction                |
| Oligo9      | CTGTCAAACACTGATAGTTTCTGCAGTGCAGCGTGACCCG                     | <i>ZmUbiq</i> : <i>RUBY</i> construction     |
| Oligo10     | CGCATGATCCATACTAGTTTCTGCAGAAGTAACACCAAAC                     | <i>ZmUbiq</i> : <i>RUBY</i> construction     |
| Oligo11     | CTGTCAAACACTGATAGTTTATGTCCAACATGCATGCG                       | <i>AtYUC4</i> : <i>RUBY</i> construction     |
| Oligo12     | CGCATGATCCATACTAGTTTGTGCTACTAATAAAGCGAAAGAGAG                | <i>AtYUC4</i> : <i>RUBY</i> construction     |
| Oligo13     | CTGTCAAACACTGATAGTTTTAAGCTGGCACAACATATATT                    | <i>AtAT2S3</i> : <i>RUBY</i> construction    |
| Oligo14     | CGCATGATCCATACTAGTTTTGTTGGTACCGTTTTGCTAT                     | <i>AtAT2S3</i> : <i>RUBY</i> construction    |
| Oligo15     | TAAGGGACTGACCACCCGGGGATCCGGTATCGATAAGCTTGCAGCC               | <i>pDR5:eGFP</i> construction                |
| Oligo16     | CAGCGCTGAAGCTTGGCTGCAGTGAATTGTAAATAGTAATTGTAATG              | <i>pDR5:eGFP</i> construction                |
| Oligo17     | CACTGCAGCCAAGCTTCAGCGCTGTAGATCTCCATGGATCATGCGACCCTCG         | <i>pDR5</i> : <i>RUBY</i> construction       |
| Oligo18     | CATCTCCAGCCAACCTCAACAAATCAAAATTCACAATTGGTAGCGCGGAATCGGGATG   | <i>pDR5</i> : <i>RUBY</i> construction       |
| Oligo19     | GTTGAAGTTGGCTGGAGATGTTGAATCTAATCTGGACCTAAGATGATGAACGCGGAGG   | <i>pDR5</i> : <i>RUBY</i> construction       |
| Oligo20     | CGATCGGGGAAATTCGAGCTGGTCACCGGCGGAGGTGAACCTGTAGG              | <i>pDR5</i> : <i>RUBY</i> construction       |
| Oligo21     | GTTGAAGTTGGCTGGAGATGTTGAATCTAATCTGGACCTACCGCCATCAAGATGAACA   | <i>pDR5</i> : <i>RUBY</i> construction       |
| Oligo22     | TCTTCTAACATGCGGTGACGTGGAGGAGAATCCCGGCCCTACCGCCATCAAGATGAACA  | <i>pDR5</i> : <i>RUBY</i> construction       |
| Oligo23     | ACGATCGGGGAAATTCGAGCTGGTCACCTCACTATCACTGGAGGCTTG             | <i>pDR5</i> : <i>RUBY</i> construction       |
| Oligo24     | CCTACAAGTTCACCTCCGCCGAGGGCAGAGGAAGTCTTCTAACATGCGGTGACGTGGAG  | <i>pDR5</i> : <i>RUBY</i> construction       |
| Oligo25     | CTACAAGTTCACCTCCGCCAATTGTTGAATTTTGATTTGTTGAAGTTGGCTGGAGATG   | <i>pDR5</i> : <i>RUBY</i> construction       |
| Oligo26     | AACAGCATCCTTGAGTCTCTTCG                                      | qPCR primer of <i>RUBY</i>                   |
| Oligo27     | TCTCTTTGGAGATCTCGCCTTC                                       | qPCR primer of <i>RUBY</i>                   |
| Oligo28     | AACCAGCTGAGGCCAAGA                                           | qPCR primer of endogenous reference gene     |
| Oligo29     | ACGATTGATTTAACCAGTCCATGA                                     | qPCR primer of endogenous reference gene     |
| Oligo30     | CTCAACCCCAAGGCTAACAG                                         | detection the presence of rice genome DNA    |
| Oligo31     | ACCTCAGGGCATCGGAAC                                           | detection the presence of rice genome DNA    |
| Oligo32     | AGAAGATTTTCTCCAAGAAGCCGA                                     | detection the presence of <i>RUBY</i> DNA    |
| Oligo33     | ATAATGAGCACGCCATCATTCTTG                                     | detection the presence of <i>RUBY</i> DNA    |
| Oligo34     | ACGGTGTCTCCATCACAGTTTGCC                                     | detection the presence of <i>HptIII</i> gene |
| Oligo35     | GGAGAGGACACGCTGAAATCACCA                                     | detection the presence of <i>HptIII</i> gene |

Supplemental Table I: Primers used in this study.
